# Supplementary material for: Treatment patterns and frequency of key outcomes in acute severe asthma in children: a Paediatric Research in Emergency Departments International Collaborative (PREDICT) multicentre cohort study
Source: PubMed Central journal article supplement — BMJ Open Respir Res. 2022 Mar 17;9(1):e001137. doi: 10.1136/bmjresp-2021-001137 (PMC8932260; doi:10.1136/bmjresp-2021-001137), 2022-03-17
Supplement: bmjresp-2021-001137supp001.pdf [file bmjresp-2021-001137supp001.pdf]

## Supplementary information

Supplementary Table 1. Regression analysis modelling length of stay and escalation of care, using hospital as an independent variable (rather than a clustering variable)

|              | LOS   |                |        |              | Escalated Care |                |        |
|--------------|-------|----------------|--------|--------------|----------------|----------------|--------|
|              | IRR   | 95%CI          | p      |              | OR             | 95%CI          | p      |
| Age (years)  | 0.995 | (0.988, 1.003) | 0.237  | Age (years)  | 1.049          | (1.030, 1.070) | <0.001 |
| Triage       |       |                |        | Triage       |                |                |        |
| 1            | (ref) |                |        | 1            | (ref)          |                |        |
| 2            | 0.483 | (0.358, 0.653) | <0.001 | 2            | 0.141          | (0.088, 0.226) | <0.001 |
| 3            | 0.277 | (0.205, 0.374) | <0.001 | 3            | 0.027          | (0.017, 0.044) | <0.001 |
| 4            | 0.167 | (0.122, 0.229) | <0.001 | 4            | 0.005          | (0.002, 0.010) | <0.001 |
| 5            | 0.105 | (0.062, 0.180) | <0.001 | 5            | -              |                |        |
| Sex (female) | 1.052 | (1.001, 1.106) | 0.045  | Sex (female) | 1.032          | (0.898, 1.186) | 0.660  |
| Tertiary     | 4.278 | (3.824, 4.787) | <0.001 | Tertiary     | 1.084          | (0.787, 1.493) | 0.622  |
| Hospital     |       |                |        | Hospital     |                |                |        |
| K            | (ref) |                |        | K            | (ref)          |                |        |
| H            | 1.174 | (1.028, 1.341) | 0.018  | H            | 0.626          | (0.446, 0.879) | 0.007  |
| M            | 5.192 | (4.603, 5.856) | <0.001 | M            | 0.802          | (0.570, 1.128) | 0.204  |
| Q            | 0.987 | (0.883, 1.103) | 0.817  | Q            | 0.869          | (0.620, 1.218) | 0.415  |
| E            | 5.075 | (4.178, 6.165) | <0.001 | E            | 0.685          | (0.420, 1.116) | 0.129  |
| O            | 0.756 | (0.672, 0.850) | <0.001 | O            | 0.319          | (0.221, 0.461) | <0.001 |
| F            | 1.906 | (1.566, 2.319) | <0.001 | F            | 0.265          | (0.137, 0.513) | <0.001 |
| N            | 0.590 | (0.524, 0.664) | <0.001 | N            | 0.073          | (0.041, 0.129) | <0.001 |
| L            | 2.932 | (2.638, 3.259) | <0.001 | L            | 0.321          | (0.224, 0.459) | <0.001 |
| B            | 3.893 | (3.192, 4.747) | <0.001 | B            | 0.721          | (0.468, 1.112) | 0.139  |
| P            | 4.494 | (3.943, 5.122) | <0.001 | P            | 0.421          | (0.288, 0.616) | <0.001 |
| A            | 3.417 | (2.865, 4.077) | <0.001 | A            | 0.488          | (0.309, 0.770) | 0.002  |
| G            | 2.985 | (2.614, 3.408) | <0.001 | G            | 0.857          | (0.612, 1.200) | 0.370  |
| D            | 3.234 | (2.827, 3.699) | <0.001 | D            | 0.613          | (0.404, 0.929) | 0.021  |
| I            | 0.968 | (0.861, 1.088) | 0.584  | I            | 1.266          | (0.934, 1.717) | 0.129  |
| J            | 0.880 | (0.773, 1.003) | 0.056  | J            | 0.463          | (0.322, 0.666) | <0.001 |
| R            | 1.120 | (0.993, 1.263) | 0.066  | R            | 0.555          | (0.390, 0.790) | 0.001  |
| C            | -     |                |        | C            | -              |                |        |

Note: C excluded due to collinearity.
